# Supplementary material for: An ultrathin defect-rich Co3O4 nanosheet cathode for high-energy and durable aqueous zinc ion batteries
Source: Royal Society of Chemistry journal article supplement (doi:10.1039/c9ta08625k), 2019-01-01
Supplement: c9ta08625k1.pdf [file c9ta08625k1.pdf]

## Supporting Information

### Ultrathin Defect-Rich $\text{Co}_3\text{O}_4$ Nanosheets Cathode for High-Energy and Durable Aqueous Zinc Ion Battery

Yongzhuang Lu,<sup>a</sup> Jing Wang,<sup>b</sup> Siqi Zeng,<sup>a</sup> Lijun Zhou,<sup>a</sup> Wei Xu,<sup>a</sup> Dezhou Zheng,<sup>a\*</sup> Jie Liu,<sup>c</sup>  
Yinxiang Zeng,<sup>b\*</sup> and Xihong Lu<sup>a,b\*</sup>

<sup>a</sup>*School of Applied Physics and Materials, Wuyi University, Jiangmen, Guangdong 529020, P. R. China. E-mail: [523906991@qq.com](mailto:523906991@qq.com) (D. Zheng);*

<sup>b</sup>*MOE MOE of the Key Laboratory of Bioinorganic and Synthetic Chemistry, The Key Lab of Low-carbon Chem & Energy Conservation of Guangdong Province, School of Chemistry, Sun Yat-Sen University, Guangzhou 510275, P. R. China. E-mail: [zengyinx@mail2.sysu.edu.cn](mailto:zengyinx@mail2.sysu.edu.cn) (Y. Zeng); [luxh6@mail.sysu.edu.cn](mailto:luxh6@mail.sysu.edu.cn) (X. Lu)*

<sup>c</sup>*College of Chemistry and Chemical Engineering, Yantai University, Yantai 264005, P. R. China*

## **Experimental Section:**

*Preparation of  $\text{Co}_3\text{O}_4$  and R- $\text{Co}_3\text{O}_4$  nanosheets:* The synthesis of pristine  $\text{Co}_3\text{O}_4$  included the hydrothermal process and a subsequent calcination. Firstly, a piece of carbon cloth ( $3 \times 2 \text{ cm}^2$ ) was immersed in ethanol and sonicated for 15 min. 0.14 mol/L  $\text{Co}(\text{NO}_3)_2 \cdot 6\text{H}_2\text{O}$ , 0.28 mol/L  $\text{NH}_4\text{F}$ , and 0.71 mol/L urea were dissolved in distilled water to form a homogeneous solution. The solution was then transferred into a Teflon-lined autoclave and a piece of carbon cloth was then immersed into the solution. The autoclave was maintained at  $120 \text{ }^\circ\text{C}$  for 6 h, and then naturally cool down at room temperature. The as-prepared sample was annealed in air at  $350 \text{ }^\circ\text{C}$  for 2 h to obtain  $\text{Co}_3\text{O}_4$ . Further, the R- $\text{Co}_3\text{O}_4$  nanosheets were obtained by a solvothermal reduction method in ethylene glycol at  $180 \text{ }^\circ\text{C}$  for 24 h. The mass loadings of pristine  $\text{Co}_3\text{O}_4$  and R- $\text{Co}_3\text{O}_4$  nanosheets samples were  $4.21 \text{ mg cm}^{-2}$  and  $3.86 \text{ mg cm}^{-2}$  respectively, which were obtained by electronic scales (BT25S, 0.01 mg).

*Material Characterization:* The morphologies and compositions of the electrode materials were characterized using field-emission SEM (FESEM, JSM-6330F), transmission electron microscopy (TEM, FEI Tecnai G2 F30), Raman spectroscopy (Renishaw inVia), XPS (XPS, Nexsa, Thermo FS), AFM (SPM-9500J3) and XRD (Rigaku D-MAX 2200). The Co L-edge XANES spectra were collected at the photoemission end-station at beamline BL10B in the National Synchrotron Radiation Laboratory (NSRL) in Hefei, China. The surface area of the samples was calculated from nitrogen adsorption/desorption isotherms at 77 K that were obtained using a Brunauer–Emmett–Teller test (JW-BK100A).

*Electrochemical Measurement:* CV, charge-discharge measurements, and electrochemical impedance spectroscopy were conducted using an electrochemical workstation (PARSTAT MC). The electrochemical studies of individual electrodes were applied in a three-electrode cell, with a carbon rod counter electrode and a Hg/HgO reference electrode, in 6 M KOH saturated with  $\text{Zn}(\text{Ac})_2$  ( $\sim 0.5 \text{ M Zn}(\text{Ac})_2$ ) aqueous solution. The Zn//Co batteries with  $\text{Co}_3\text{O}_4$  and R- $\text{Co}_3\text{O}_4$  cathodes were assembled using zinc plate anode with 6 M KOH saturated with  $\text{Zn}(\text{Ac})_2$  as electrolyte.

### Calculations:

The areal capacity ( $C_a$ ) and specific capacity ( $C_s$ ) were calculated from the galvanostatic curve using the following equations:

$$C_a = \frac{\int_0^{\Delta t} I dt}{S} \quad (1)$$

$$C_s = \frac{\int_0^{\Delta t} I dt}{m} \quad (2)$$

Where  $C_a$  is the areal capacity ( $\text{mAh cm}^{-2}$ ),  $C_s$  is the specific capacity ( $\text{mAh g}^{-1}$ ),  $I$  (mA) is the applied discharging current,  $\Delta t$  (h) is the discharging time,  $S$  ( $\text{cm}^2$ ) is the area of the cathode and  $m$  (g) is the mass loading of the cathode.

Specific energy density  $E$  and specific power density  $P$  of the cell were obtained from the following equations:

$$E = \int_{V_1}^{V_2} C_s dV \quad (3)$$

$$P = \frac{E}{1000 \times \Delta t} \quad (4)$$

Where  $E$  ( $\text{Wh kg}^{-1}$ ) is the energy density,  $P$  is the power density ( $\text{kW kg}^{-1}$ ),  $V$  (V) is the working potential,  $C_s$  is the specific capacity ( $\text{mAh g}^{-1}$ ), and  $\Delta t$  (h) is the discharging time.

Alternatively, Volumetric energy density and power density of the device were obtained from the following equations:

$$E = \int_{V_1}^{V_2} \frac{C_a}{d} dV \quad (5)$$

$$P = \frac{E}{1000 \times \Delta t} \quad (6)$$

where  $E$  ( $\text{Wh cm}^{-3}$ ) is the energy density,  $P$  ( $\text{W cm}^{-3}$ ) is the power density,  $C_a$  is the areal capacitance ( $\text{mAh cm}^{-2}$ ) obtained from Equation (1),  $V$  (V) is the working potential,  $d$  (cm) is the thickness of the device (cm), and  $\Delta t$  (h) is the discharging time.

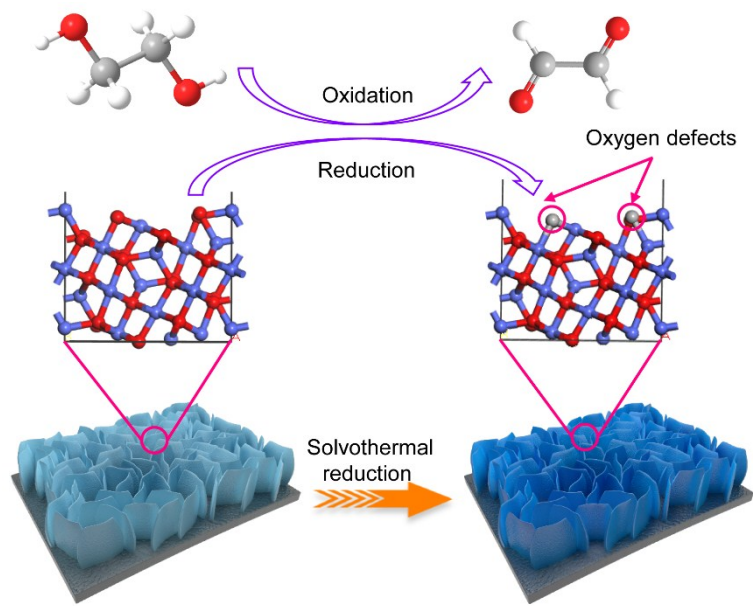

**Fig. S1.** The schematic illustration of creating oxygen vacancy defects on the surface of ultrathin  $\text{Co}_3\text{O}_4$  nanosheets.

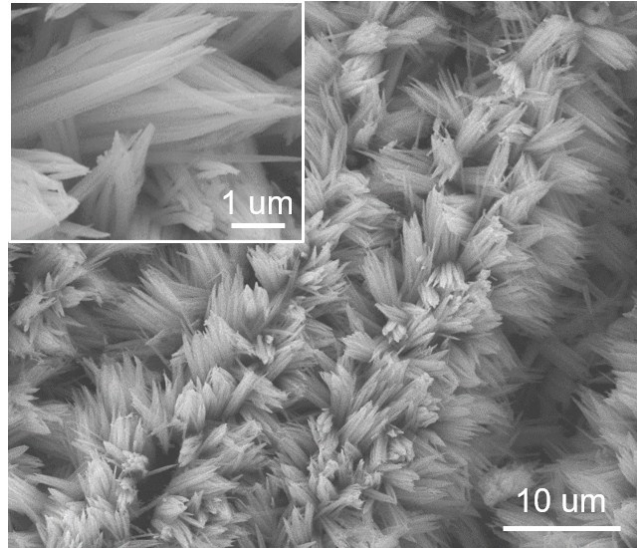

**Fig. S2.** SEM images of the pristine  $\text{Co}_3\text{O}_4$  nanowire sample.

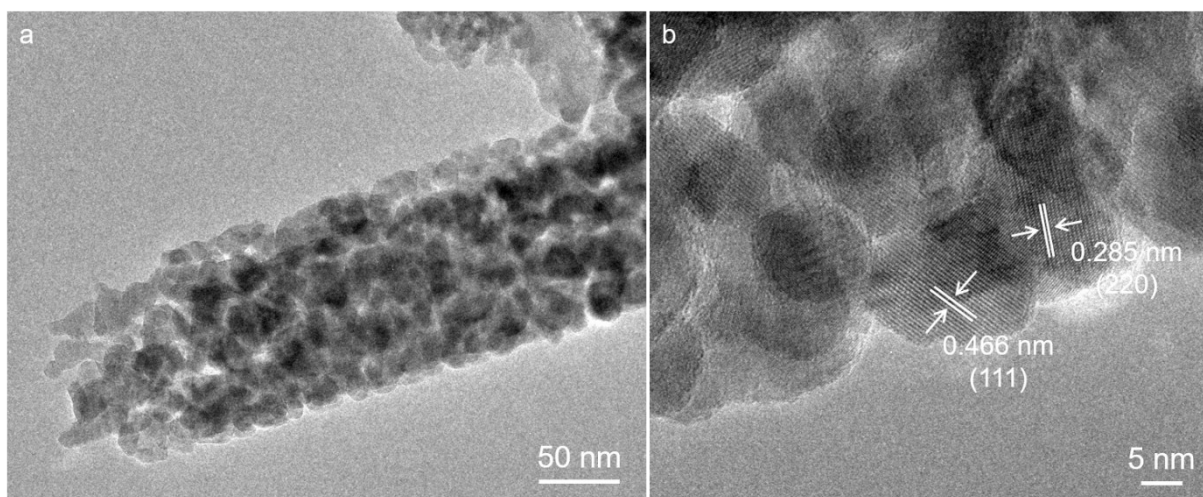

**Fig. S3.** (a) TEM image and (b) HRTEM image of the pristine  $\text{Co}_3\text{O}_4$  nanowire sample.

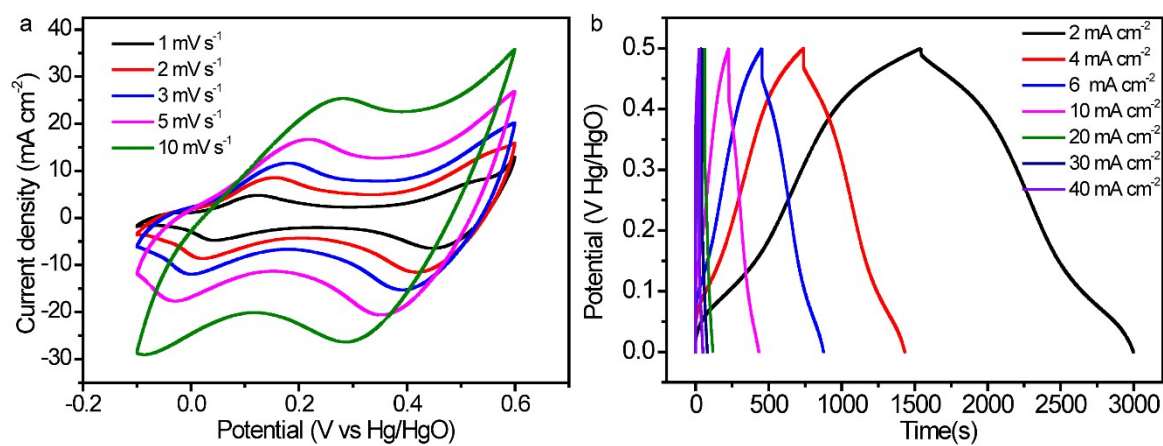

**Fig. S4.** (a) CV curves at various scan rates; (b) charge-discharge profiles at different current densities for the R- $\text{Co}_3\text{O}_4$  nanowire electrode.

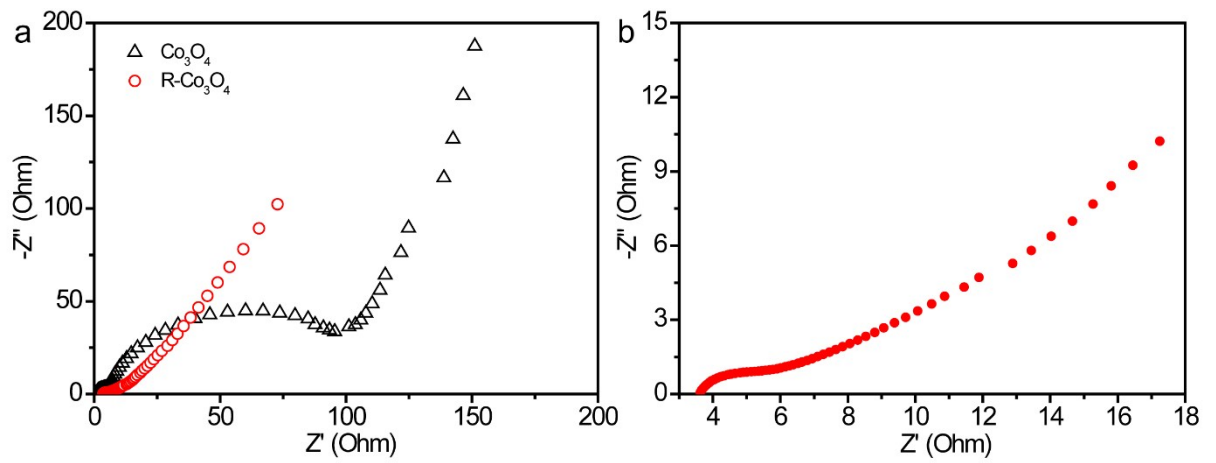

**Fig. S5.** (a) Nyquist plots of the pristine  $\text{Co}_3\text{O}_4$  and  $\text{R-Co}_3\text{O}_4$  electrodes. (b) Enlarged Nyquist plot of the  $\text{R-Co}_3\text{O}_4$  electrode.

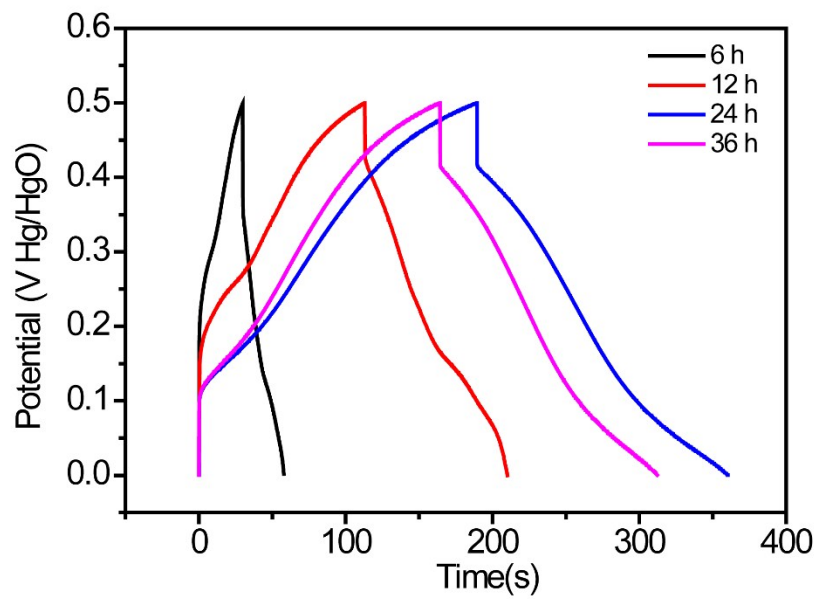

**Fig. S6.** Charge-discharge profiles for the  $\text{R-Co}_3\text{O}_4$  nanowire electrodes reduced with different times at  $10 \text{ mA cm}^{-2}$ .

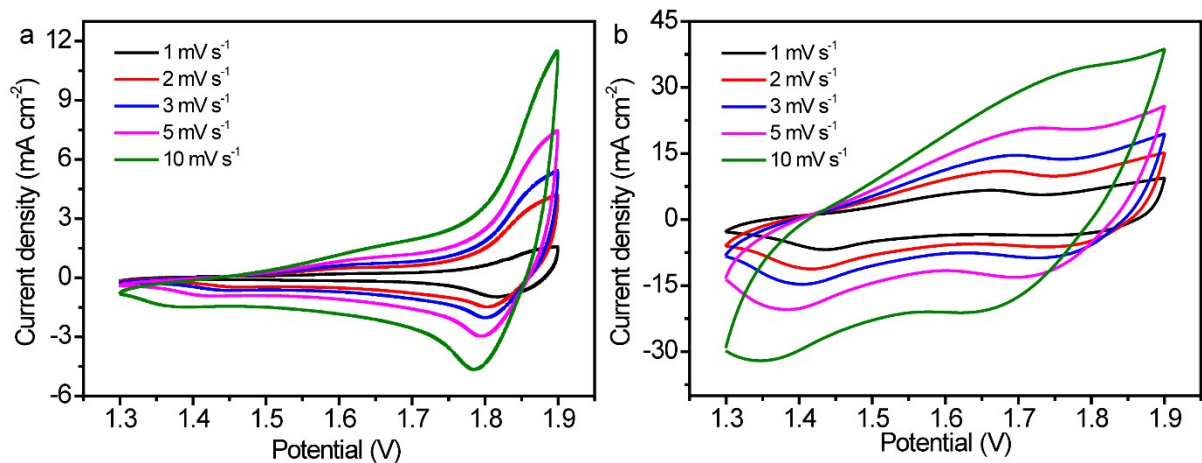

**Fig. S7.** CV curves of the Zn//Co batteries with (a) pristine  $\text{Co}_3\text{O}_4$  and (b) R- $\text{Co}_3\text{O}_4$  cathodes at various scan rates.

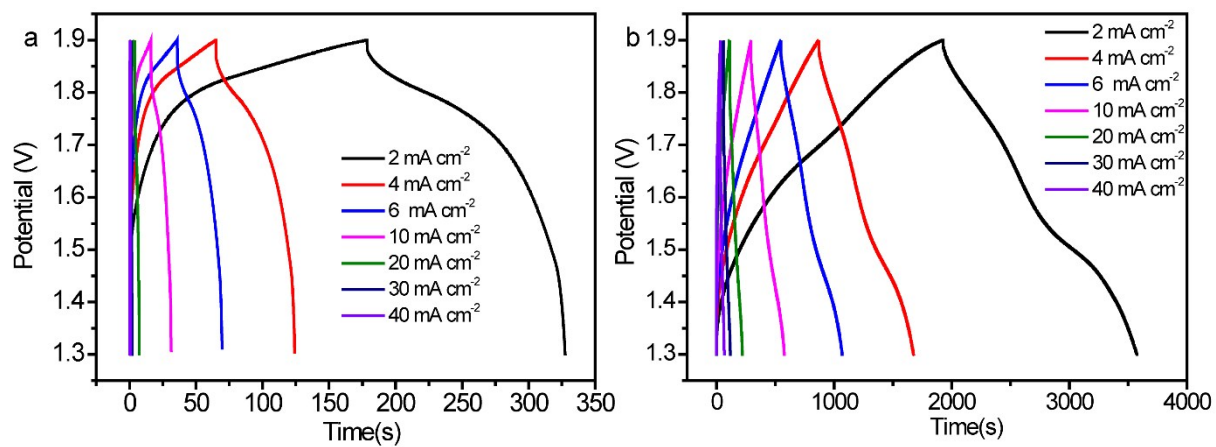

**Fig. S8.** Charge-discharge profiles of the Zn//Co batteries with (a) pristine  $\text{Co}_3\text{O}_4$  and (b) R- $\text{Co}_3\text{O}_4$  cathodes at various current densities.

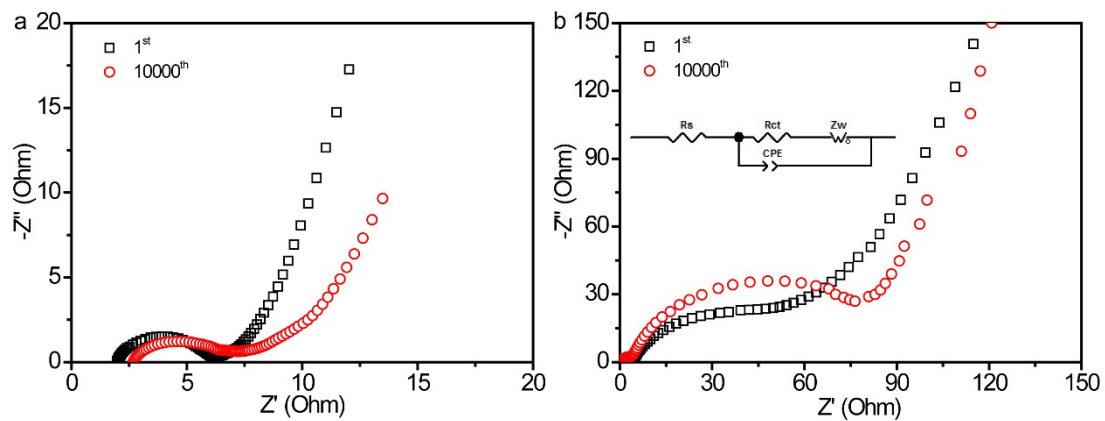

**Fig. S9.** Nyquist plots of the Zn//Co batteries with (a) R-Co<sub>3</sub>O<sub>4</sub> and (b) pristine Co<sub>3</sub>O<sub>4</sub> cathodes; and the corresponding equivalent circuit diagram of the Zn//Co batteries is inset in the Fig. S9b.

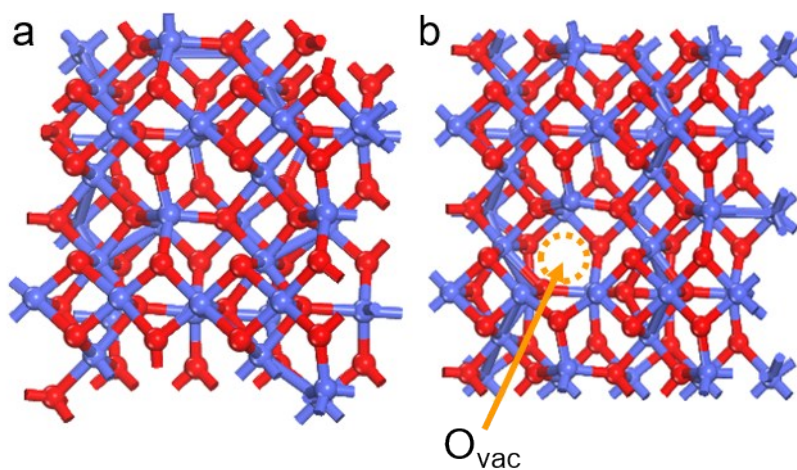

**Fig. S10.** Constructed models of Co<sub>3</sub>O<sub>4</sub> (311) surfaces with (a) perfect surface (presenting Co<sub>3</sub>O<sub>4</sub>) and (b) a surface with an oxygen vacancy (presenting R-Co<sub>3</sub>O<sub>4</sub>).



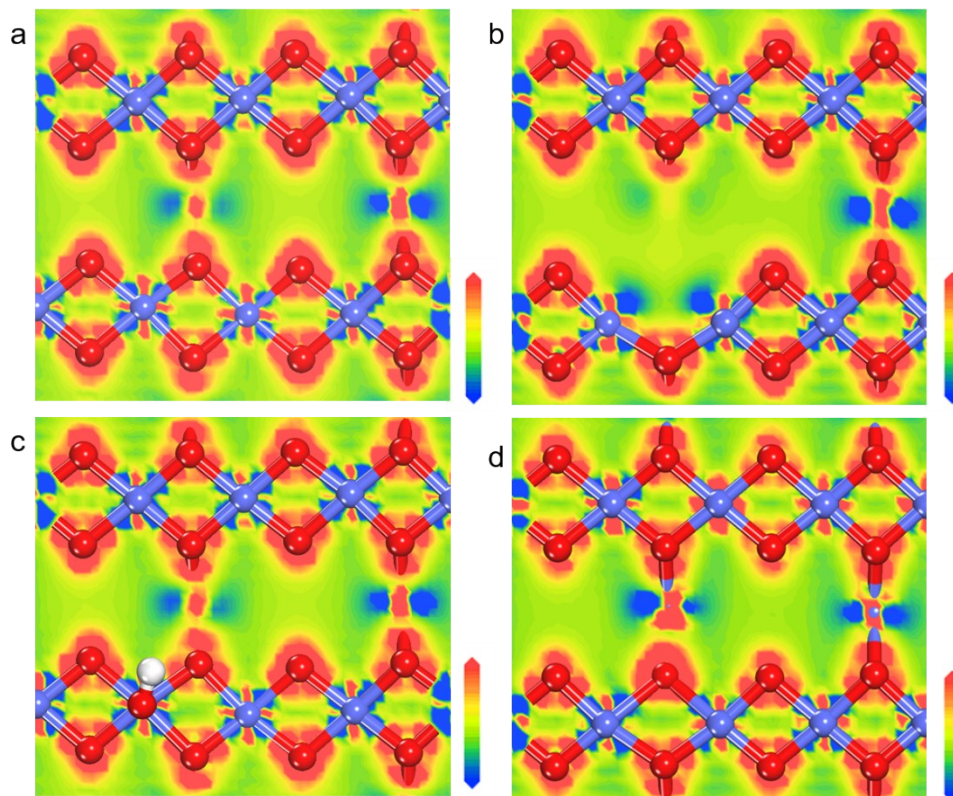

**Fig. S11.** The top-view electron density difference of (a) pristine  $\text{Co}_3\text{O}_4$ , (b)  $\text{R-Co}_3\text{O}_4$  with one oxygen vacancy, (c) pristine  $\text{Co}_3\text{O}_4$  after adsorption of  $\text{OH}^-$ , and (d)  $\text{R-Co}_3\text{O}_4$  with one oxygen vacancy after adsorption of  $\text{OH}^-$ .

**Table S1.** Comparison of our Zn//R-Co<sub>3</sub>O<sub>4</sub> battery with some recently reported Zn-based batteries.

| Battery                                                                                        | Electrolyte                                                | Capacity (mAh g <sup>-1</sup> )                                                                    |
|------------------------------------------------------------------------------------------------|------------------------------------------------------------|----------------------------------------------------------------------------------------------------|
| Zn//R-Co <sub>3</sub> O <sub>4</sub>                                                           | 6 M KOH saturated with Zn(Ac) <sub>2</sub>                 | 240.8 (0.53 A g <sup>-1</sup> ); 159.8 (5.3 A g <sup>-1</sup> );<br>96.3 (10.5 A g <sup>-1</sup> ) |
| Zn//Co <sub>3</sub> O <sub>4</sub>                                                             | 6 M KOH saturated with Zn(Ac) <sub>2</sub>                 | 19.7 (0.48 A g <sup>-1</sup> ); 4.72 (4.8 A g <sup>-1</sup> )                                      |
| Ni <sub>3</sub> S <sub>2</sub> //Zn <sup>1</sup>                                               | 1 M KOH + 0.02 M Zn(Ac) <sub>2</sub>                       | 148 (0.2 A g <sup>-1</sup> ); 68 (5 A g <sup>-1</sup> )                                            |
| Zn@CF//Co <sub>3</sub> O <sub>4</sub> <sup>2</sup>                                             | 1 M KOH + 0.001 M Zn(Ac) <sub>2</sub>                      | 168 (1 A g <sup>-1</sup> ); 78 (10 A g <sup>-1</sup> )                                             |
| Zn//Co(III) rich-Co <sub>3</sub> O <sub>4</sub> <sup>3</sup>                                   | 2 M ZnSO <sub>4</sub> + 0.2 M CoSO <sub>4</sub>            | 200 (0.5 A g <sup>-1</sup> ); 91 (5 A g <sup>-1</sup> )                                            |
| CC-CF@NiO//CC-CF@ZnO <sup>4</sup>                                                              | 2 M KOH saturated with ZnO                                 | 203 (0.96 A g <sup>-1</sup> ); 78 (10 A g <sup>-1</sup> )                                          |
| Zn//CuHCF <sup>5</sup>                                                                         | 0.02 M ZnSO <sub>4</sub>                                   | 54 (0.06 A g <sup>-1</sup> ); 43.7 (0.6 A g <sup>-1</sup> )                                        |
| Zn//ZnHCF <sup>6</sup>                                                                         | 3 M ZnSO <sub>4</sub>                                      | 66.5 (0.06 A g <sup>-1</sup> ); 29.3 (1.2 A g <sup>-1</sup> )                                      |
| Zn//Na <sub>3</sub> V <sub>2</sub> (PO <sub>4</sub> ) <sub>2</sub> F <sub>3</sub> <sup>7</sup> | 2 M Zn(CF <sub>3</sub> SO <sub>3</sub> ) <sub>2</sub>      | 60 (0.2 A g <sup>-1</sup> ); 33 (3 A g <sup>-1</sup> )                                             |
| Zn//Na <sub>3</sub> V <sub>2</sub> (PO <sub>4</sub> ) <sub>3</sub> <sup>8</sup>                | 0.5 M Zn(CH <sub>3</sub> COO) <sub>2</sub>                 | 97 (0.05 A g <sup>-1</sup> ); 58 (1 A g <sup>-1</sup> )                                            |
| Zn//VS <sub>2</sub> <sup>9</sup>                                                               | 1 M ZnSO <sub>4</sub>                                      | 159.1 (0.1 A g <sup>-1</sup> ); 115.5 (2 A g <sup>-1</sup> )                                       |
| Zn//Na <sub>0.33</sub> V <sub>2</sub> O <sub>5</sub> <sup>10</sup>                             | 3 M Zn(CF <sub>3</sub> SO <sub>3</sub> ) <sub>2</sub>      | 173.4 (0.5 A g <sup>-1</sup> ); 96.4 (2 A g <sup>-1</sup> )                                        |
| Zn//a-MnO <sub>2</sub> /CNT battery <sup>11</sup>                                              | 0.3 M ZnSO <sub>4</sub> + 0.015 M MnSO <sub>4</sub>        | 145 (0.1 A g <sup>-1</sup> ); 97 (0.25 A g <sup>-1</sup> )                                         |
| Zn//ZnMn <sub>2</sub> O <sub>4</sub> <sup>12</sup>                                             | 2 M Zn(CF <sub>3</sub> SO <sub>3</sub> ) <sub>2</sub>      | ~ 150 (0.05 A g <sup>-1</sup> ); 72 (2 A g <sup>-1</sup> )                                         |
| Zn//Mn <sub>3</sub> O <sub>4</sub> <sup>13</sup>                                               | 2 M ZnSO <sub>4</sub> + 0.1 M MnSO <sub>4</sub>            | 185 (0.3 A g <sup>-1</sup> ); 125 (0.5 A g <sup>-1</sup> )                                         |
| Zn//MnO <sub>2</sub> @CNT <sup>14</sup>                                                        | 2 M Zn(CF <sub>3</sub> SO <sub>3</sub> ) <sub>2</sub> -PVA | 188 (0.1 A g <sup>-1</sup> ); 45 (2 A g <sup>-1</sup> )                                            |
| Zn//MnO <sub>2</sub> <sup>15</sup>                                                             | 2 M ZnSO <sub>4</sub> + 0.2 M MnSO <sub>4</sub>            | ~235 (0.754 A g <sup>-1</sup> ); 43 (1.885 A g <sup>-1</sup> )                                     |

## Reference:

1. P. Hu, T. Wang, J. Zhao, C. Zhang, J. Ma, H. Du, X. Wang and G. Cui, *ACS Appl. Mater. Interfaces*, 2015, **7**, 26396-26399.
2. X. Wang, F. Wang, L. Wang, M. Li, Y. Wang, B. Chen, Y. Zhu, L. Fu, L. Zha, L. Zhang, Y. Wu and W. Huang, *Adv. Mater.*, 2016, **28**, 4904-4911.
3. L. Ma, S. Chen, H. Li, Z. Ruan, Z. Tang, Z. Liu, Z. Wang, Y. Huang, Z. Pei and J. A. Zapien, *Energy Environ. Sci.*, 2018, **11**, 2521-2530.
4. J. Liu, C. Guan, C. Zhou, Z. Fan, Q. Ke, G. Zhang, C. Liu and J. Wang, *Adv. Mater.*, 2016, **28**, 8732-8739.
5. R. Trocoli and F. La Mantia, *ChemSusChem*, 2015, **8**, 481-485.
6. L. Zhang, L. Chen, X. Zhou and Z. Liu, *Sci. Rep.*, 2015, **5**, 18263.
7. W. Li, K. Wang, S. Cheng and K. Jiang, *Energy Storage Mater.*, 2018, **15**, 14-21.
8. G. Li, Z. Yang, Y. Jiang, C. Jin, W. Huang, X. Ding and Y. Huang, *Nano Energy*, 2016, **25**, 211-217.
9. P. He, M. Yan, G. Zhang, R. Sun, L. Chen, Q. An and L. Mai, *Adv. Energy Mater.*, 2017, **7**, 1601920.
10. P. He, G. Zhang, X. Liao, M. Yan, X. Xu, Q. An, J. Liu and L. Mai, *Adv. Energy Mater.*, 2018, **8**, 1702463.
11. F. Mo, H. Li, Z. Pei, G. Liang, L. Ma, Q. Yang, D. Wang, Y. Huang and C. Zhi, *Science Bulletin*, 2018, **63**, 1077-1086.
12. N. Zhang, F. Cheng, Y. Liu, Q. Zhao, K. Lei, C. Chen, X. Liu and J. Chen, *J. Am. Chem. Soc.*, 2016, **138**, 12894-12901.
13. C. Zhu, G. Fang, J. Zhou, J. Guo, Z. Wang, C. Wang, J. Li, Y. Tang and S. Liang, *J. Mater. Chem. A*, 2018, **6**, 9677-9683.
14. K. Wang, X. Zhang, J. Han, X. Zhang, X. Sun, C. Li, W. Liu, Q. Li and Y. Ma, *ACS Appl. Mater. Interfaces*, 2018, **10**, 24573-24582.
15. W. Sun, F. Wang, S. Hou, C. Yang, X. Fan, Z. Ma, T. Gao, F. Han, R. Hu, M. Zhu and C. Wang, *J. Am. Chem. Soc.*, 2017, **139**, 9775-9778.
